# Supplementary material
Source: PubMed Central journal article supplement (PMC3211389)
Supplement: jp202413q_si_001.pdf [file jp202413q_si_001.pdf]

*Supporting information for the paper:*

*Self- assembly of polyion-surfactant ion complex salts in mixtures  
with water and n-alcohols*

Juliana Silva Bernardes, Lennart Piculell, Watson Loh

## 1. Tabulated structural parameters

In the tables S1 - S8 below, the samples marked with asterisks (\*) were analyzed in a different experimental set up of the SAXS beamline. The values of their cell parameters are slightly, but consistently, lower than those previously obtained, thus these SAXS results were only used to elucidate the structure of liquid crystalline phases, but their numerical information was not used.

Table S1: Structural parameters for liquid crystalline systems formed by the mixture octanol/CTAPA<sub>30</sub>/water. Symbols:  $d_{hc}$  is the lamellae thickness;  $r_{hc}$  is the hydrophobic radius of the aggregate cylinder in hexagonal phases;  $r_{aq}$  is the hydrophilic radius of the aggregate in reversed hexagonal phases and  $a_s$  represents the area per surfactant headgroup.

| Sample | Octanol wt % | Water wt % | CTAPA <sub>30</sub> Wt % | Structure                 | Cell Parameter (Å) | $r_{hc}/r_{aq}$ (Å)                | $a_s$ (Å <sup>2</sup> ) |
|--------|--------------|------------|--------------------------|---------------------------|--------------------|------------------------------------|-------------------------|
| 1      | 4            | 73         | 23                       | Hexagonal                 | H: 51.3            | $r_{hc}$ : 15.3                    | H: 71.7                 |
| 2      | 5            | 69         | 26                       | Hexagonal + Lamellar      | H: 56.7<br>L: 43.6 | $r_{hc}$ : 17.8<br>$d_{hc}$ : 18.9 | H: 68.2<br>L: 84.5      |
| 3      | 7            | 69         | 24                       | Hexagonal + Lamellar      | H: 51.2<br>L: 40.1 | $r_{hc}$ : 16.1<br>$d_{hc}$ : 17.3 | H: 75.5<br>L: 91.8      |
| 4      | 12           | 63         | 25                       | Lamellar                  | L: 41.5            | $d_{hc}$ : 16.1                    | L: 146.9                |
| 5      | 14           | 62         | 24                       | Lamellar                  | L: 44.4            | $d_{hc}$ : 19.4                    | L: 122.1                |
| 6      | 21           | 57         | 22                       | Lamellar + rev. Hexagonal | L: 41.4<br>H: 42.0 | $d_{hc}$ : 20.5<br>$r_{aq}$ : 14.7 | L: 115.6<br>H: -----    |
| 7      | 28           | 53         | 19                       | Lamellar + rev. Hexagonal | L: 44.3<br>H: 44.6 | $d_{hc}$ : 22.2<br>$r_{aq}$ : 15.6 | L: 97.0<br>H: -----     |
| 8      | 41           | 42         | 16                       | Rev.Hexagonal             | H: 44.3            | $r_{aq}$ : 14.7                    | -----                   |
| 9*     | 44           | 40         | 16                       | Rev.Hexagonal             | H: 40.6            | $r_{aq}$ : 13.5                    | -----                   |
| 10*    | 47           | 34         | 19                       | Rev.Hexagonal             | H: 39.4            | -----                              | -----                   |
| 11     | 51           | 5          | 44                       | Rev.Hexagonal             | H: 36.0            | -----                              | -----                   |
| 12     | 43           | 18         | 39                       | Lamellar + rev. Hexagonal | L: 40.2<br>H: 38.5 | -----                              | -----                   |
| 13     | 37           | 29         | 34                       | Lamellar + rev. Hexagonal | L: 42.8<br>H: 42.6 | -----                              | -----                   |
| 14     | 37           | 33         | 30                       | Lamellar + rev. Hexagonal | L: 41.3<br>H: 41.9 | -----                              | -----                   |
| 15*    | 38           | 34         | 28                       | Lamellar + rev. Hexagonal | L: 38.9<br>H: 40.0 | -----                              | -----                   |
| 16     | 29           | 45         | 26                       | Lamellar + rev. Hexagonal | L: 44.3<br>H: 44.4 | $d_{hc}$ : 22.2<br>$r_{aq}$ : 15.5 | L: 97.0<br>H: -----     |

Table S2: Structural parameters for liquid crystalline systems formed by the mixture hexanol/CTAPA<sub>30</sub>/water. Symbols:  $d_{hc}$  is the lamellae thickness;  $r_{hc}$  is the radius of the aggregate cylinder in hexagonal phases and  $a_s$  represents the area per surfactant headgroup.

| Sample | Hexanol wt % | Water wt % | CTAPA <sub>30</sub> wt % | Structure            | Cell Parameter (Å) | rhc/ dhc (Å)                       | As (Å <sup>2</sup> ) |
|--------|--------------|------------|--------------------------|----------------------|--------------------|------------------------------------|----------------------|
| 1      | 7            | 65         | 28                       | Hexagonal + Lamellar | H: 60.2<br>L: 45.4 | $r_{hc}$ : 19.2<br>$d_{hc}$ : 21.1 | H: 61.2<br>L: 74.1   |
| 2      | 12           | 59         | 29                       | Hexagonal + Lamellar | H: 60.6<br>L: 46.0 | $r_{hc}$ : 19.3<br>$d_{hc}$ : 21.4 | H: 60.8<br>L: 73.1   |
| 3      | 21           | 54         | 25                       | Lamellar             | L: 44.5            | $d_{hc}$ : 23.4                    | L: 101.0             |
| 4      | 28           | 49         | 23                       | Lamellar             | L: 46.3            | $d_{hc}$ : 25.1                    | L: 94.4              |
| 5      | 40           | 41         | 19                       | Lamellar             | L: 44.9            | $d_{hc}$ : 24.3                    | L: 97.4              |
| 6      | 46           | 14         | 40                       | Lamellar             | L: 43.7            | -----                              | -----                |
| 7      | 38           | 24         | 38                       | Lamellar             | L: 45.2            | -----                              | -----                |
| 8*     | 40           | 24         | 36                       | Lamellar             | L: 34.6            | -----                              | -----                |
| 9*     | 37           | 37         | 36                       | Lamellar             | L: 36.5            | $d_{hc}$ : 19.0                    | L: 101.4             |

Table S3: Structural parameters for liquid crystalline systems formed by the mixture butanol/CTAPA<sub>30</sub>/water. Symbols:  $d_{hc}$  is the lamellae thickness;  $r_{hc}$  is the radius of the aggregate cylinder in hexagonal phases and  $a_s$  represents the area per surfactant headgroup.

| Sample | Butanol wt % | Water wt % | CTAPA <sub>30</sub> wt % | Structure            | Cell Parameter (Å) | rhc/ dhc (Å)                       | As (Å <sup>2</sup> ) |
|--------|--------------|------------|--------------------------|----------------------|--------------------|------------------------------------|----------------------|
| 1      | 6            | 65         | 29                       | Hexagonal            | H: 59.2            | $r_{hc}$ : 18.8                    | H: 62.3              |
| 2      | 12           | 60         | 28                       | Hexagonal + Lamellar | H: 56.5<br>L: 42.6 | $r_{hc}$ : 18.7<br>$d_{hc}$ : 17.7 | H: 69.6<br>L: 77.1   |
| 3*     | 14           | 62         | 24                       | Lamellar             | L: 36.4            | $d_{hc}$ : 15.6                    | L: 92.6              |
| 4      | 27           | 48         | 25                       | Lamellar             | L: 44.3            | $d_{hc}$ : 18.9                    | L: 76.1              |
| 5*     | 28           | 17         | 55                       | Lamellar             | L: 31.4            | $d_{hc}$ : 20.3                    | L: 82.0              |
| 6*     | 21           | 20         | 59                       | Lamellar             | L: 31.8            | $d_{hc}$ : 19.1                    | L: 75.2              |

Table S4: Structural parameter for liquid crystalline systems formed by the mixture ethanol/CTAPA<sub>30</sub>/water.

| Sample | Ethanol<br>wt % | Water<br>wt % | CTAPA <sub>30</sub><br>wt % | Structure            | Cell<br>Parameter<br>(Å) |
|--------|-----------------|---------------|-----------------------------|----------------------|--------------------------|
| 1*     | 4               | 69            | 27                          | Cubic                | C: 145.0                 |
| 2*     | 9               | 66            | 25                          | Hexagonal            | H: 46.8                  |
| 3*     | 15              | 61            | 24                          | Hexagonal            | H: 44.3                  |
| 4*     | 16              | 62            | 22                          | Hexagonal            | H: 45.0                  |
| 5*     | 20              | 59            | 21                          | Hexagonal            | H: 44.0                  |
| 6*     | 26              | 55            | 19                          | Hexagonal            | H: 43.8                  |
| 7*     | 55              | 15            | 30                          | Elongated<br>Micelle | L <sub>2</sub> : 28.8    |
| 8*     | 35              | 17            | 48                          | Elongated<br>Micelle | L <sub>2</sub> : 28.5    |
| 9*     | 30              | 26            | 44                          | Elongated<br>Micelle | L <sub>2</sub> : 31.5    |
| 10*    | 23              | 31            | 46                          | Hexagonal            | H: 39.2                  |
| 11*    | 16              | 35            | 49                          | Hexagonal            | H: 43.5                  |
| 12*    | 24              | 45            | 31                          | Hexagonal            | H: 43.4                  |
| 13*    | 12              | 36            | 52                          | Hexagonal            | H: 46.1                  |
| 14*    | 9               | 47            | 44                          | Hexagonal            | H: 46.6                  |

Table S5: Structural parameters for liquid crystalline systems formed by the mixture octanol/CTAPA<sub>6000</sub>/water. Symbols:  $d_{hc}$  is the lamellae thickness;  $r_{hc}$  is the radius of the aggregate cylinder in hexagonal phases;  $r_{aq}$  is the hydrophilic radius of the aggregate in reversed hexagonal phases and  $a_s$  represents the area per surfactant headgroup.

| Sample | Octanol<br>wt % | Water<br>wt % | CTAPA <sub>6000</sub><br>wt % | Structure                   | Cell<br>Parameter<br>(Å) | $r_{hc}/$<br>$d_{hc}/r_{aq}$<br>(Å) | $a_s$<br>(Å <sup>2</sup> ) |
|--------|-----------------|---------------|-------------------------------|-----------------------------|--------------------------|-------------------------------------|----------------------------|
| 1      | 1               | 74            | 24                            | Hexagonal                   | H: 49.9                  | $r_{hc}$ : 15.6                     | H: 63.3                    |
| 2      | 6               | 70            | 24                            | Hexagonal +<br>Lamellar     | H: 51.1<br>L: 38.3       | $r_{hc}$ : 16.2<br>$d_{hc}$ : 16.0  | H: 64.9<br>L: 87.8         |
| 3      | 5               | 69            | 26                            | Hexagonal +<br>Lamellar     | H: 56.0<br>L: 43.1       | $r_{hc}$ : 17.8<br>$d_{hc}$ : 18.0  | H: 59.2<br>L: 78.0         |
| 4      | 13              | 64            | 23                            | Lamellar                    | L: 43.6                  | $d_{hc}$ : 17.8                     | L: 132.6                   |
| 5      | 18              | 60            | 22                            | Lamellar                    | L: 44.3                  | $d_{hc}$ : 20.1                     | L: 117.6                   |
| 6      | 30              | 50            | 20                            | Lamellar +<br>Rev.Hexagonal | L: 44.5<br>H: 42.7       | $d_{hc}$ : 21.5<br>$r_{aq}$ : 14.7  | L: 110.2<br>H: 74.1        |
| 7      | 49              | 39            | 12                            | Rev.Hexagonal               | H: 42.7                  | $r_{aq}$ : 14.9                     | -----                      |
| 8      | 67              | 27            | 6                             | Rev.Hexagonal               | H: 39.3                  | $r_{aq}$ : 13.7                     | -----                      |
| 9      | 80              | 4             | 16                            | Rev.Hexagonal               | H: 34.3                  | -----                               | -----                      |
| 10*    | 61              | 24            | 15                            | Rev.Hexagonal               | H: 38.6                  | -----                               | -----                      |
| 11*    | 56              | 33            | 11                            | Rev.Hexagonal               | H: 38.5                  | -----                               | -----                      |
| 12*    | 42              | 25            | 33                            | Lamellar +<br>Rev.Hexagonal | L: 38.0<br>H: 36.7       | -----                               | -----                      |
| 13*    | 38              | 34            | 28                            | Lamellar +<br>Rev.Hexagonal | L: 39.3<br>H: 38.3       | -----                               | -----                      |
| 14     | 37              | 33            | 30                            | Lamellar +<br>Rev.Hexagonal | L: 44.6<br>H: 42.5       | -----                               | -----                      |
| 15     | 32              | 37            | 31                            | Lamellar +<br>Rev.Hexagonal | L: 41.5<br>H: 39.6       | -----                               | -----                      |
| 16     | 29              | 44            | 27                            | Lamellar +<br>Rev.Hexagonal | L: 42.2<br>H: 42.2       | -----                               | -----                      |

Table S6: Structural parameters for liquid crystalline systems formed by the mixture hexanol/CTAPA<sub>6000</sub>/water. Symbols:  $d_{hc}$  is the lamellae thickness;  $r_{hc}$  is the radius of the aggregate cylinder in hexagonal phases;  $r_{aq}$  is the hydrophilic radius of the aggregate in reversed hexagonal phases and  $a_s$  represents the area per surfactant headgroup.

| Sample | Hexanol<br>wt % | Water<br>wt % | CTAPA <sub>6000</sub><br>wt % | Structure                    | Cell<br>Parameter<br>(Å) | $r_{hc}/$<br>$d_{hc}/r_{aq}$<br>(Å) | $a_s$<br>(Å <sup>2</sup> ) |
|--------|-----------------|---------------|-------------------------------|------------------------------|--------------------------|-------------------------------------|----------------------------|
| 1      | 7               | 64            | 29                            | Hexagonal +<br>Lamellar      | H: 62.3<br>L: 46.5       | $r_{hc}$ : 20.1<br>$d_{hc}$ : 20.7  | H: 50.5<br>L: 67.3         |
| 2      | 11              | 60            | 29                            | Lamellar                     | L: 45.9                  | $d_{hc}$ : 21.7                     | L: 72.3                    |
| 3      | 21              | 54            | 25                            | Lamellar + rev.<br>Hexagonal | L: 46.3<br>H: 45.7       | $d_{hc}$ : 19.9<br>$r_{aq}$ : 17.4  | L: 118.9<br>H: -----       |
| 4      | 28              | 50            | 22                            | Lamellar + rev.<br>Hexagonal | L: 46.5<br>H: 46.4       | $d_{hc}$ : 20.0<br>$r_{aq}$ : 17.7  | L: 118.4<br>H: -----       |
| 5      | 38              | 42            | 20                            | Rev.Hexagonal                | H: 47.2                  | $r_{aq}$ : 16.4                     | -----                      |
| 6      | 41              | 42            | 17                            | Rev.Hexagonal                | H: 46.8                  | $r_{aq}$ : 16.3                     | -----                      |
| 7*     | 46              | 13            | 41                            | Lamellar + rev.<br>Hexagonal | L: 45.9<br>H: 39.6       | -----                               | -----                      |
| 8*     | 44              | 17            | 39                            | Rev.Hexagonal                | H: 40.4                  | -----                               | -----                      |
| 9*     | 40              | 24            | 36                            | Lamellar + rev.<br>Hexagonal | L: 44.9<br>H: 42.7       | -----                               | -----                      |
| 10*    | 35              | 36            | 29                            | Lamellar + rev.<br>Hexagonal | L: 46.0<br>H: 46.7       | -----                               | -----                      |
| 11*    | 30              | 46            | 24                            | Lamellar + rev.<br>Hexagonal | L: 46.0<br>H: 46.1       | $d_{hc}$ : 19.8<br>$r_{aq}$ : 17.6  | L: 119.7<br>H: -----       |

Table S7: Structural parameters for liquid crystalline systems formed by the mixture butanol/CTAPA<sub>6000</sub>/water. Symbols:  $d_{hc}$  is the lamellae thickness;  $r_{hc}$  is the radius of the aggregate cylinder in hexagonal phases and  $a_s$  represents the area per surfactant headgroup.

| Sample | Butanol wt % | Water wt % | CTAPA <sub>6000</sub> wt % | Structure | Cell Parameter (Å) | $r_{hc}/d_{hc}/(\text{Å})$ | $a_s (\text{Å}^2)$ |
|--------|--------------|------------|----------------------------|-----------|--------------------|----------------------------|--------------------|
| 1      | 5            | 67         | 28                         | Hexagonal | H: 60.3            | $r_{hc}$ : 20.8            | H: 54.3            |
| 2*     | 18           | 60         | 22                         | Lamellar  | L: 34.2            | $d_{hc}$ : 17.6            | L: 115.4           |
| 3      | 22           | 53         | 25                         | Lamellar  | L: 39.6            | $d_{hc}$ : 20.4            | L: 107.7           |
| 4      | 27           | 51         | 22                         | Lamellar  | L: 43.6            | $d_{hc}$ : 23.1            | L: 108.4           |
| 5*     | 32           | 18         | 50                         | Lamellar  | L: 31.8            | $d_{hc}$ : 23.3            | L: 138.8           |
| 6*     | 22           | 32         | 46                         | Lamellar  | L: 33.0            | $d_{hc}$ : 17.8            | L: 91.1            |

Table S8: Structural parameter for liquid crystalline systems formed by the mixture ethanol/CTAPA<sub>6000</sub>/water.

| Sample | Ethanol wt % | Water wt % | CTAPA <sub>6000</sub> wt % | Structure | Cell Parameter (Å) |
|--------|--------------|------------|----------------------------|-----------|--------------------|
| 1*     | 4            | 70         | 26                         | Hexagonal | H: 44.8            |
| 2*     | 16           | 62         | 22                         | Hexagonal | H: 43.9            |
| 3*     | 33           | 50         | 17                         | Hexagonal | H: 39.6            |
| 4*     | 16           | 34         | 50                         | Hexagonal | H: 43.4            |
| 5*     | 10           | 44         | 46                         | Hexagonal | H: 44.8            |
| 6*     | 23           | 34         | 43                         | Hexagonal | H: 45.4            |
| 7*     | 16           | 45         | 39                         | Hexagonal | H: 43.1            |

## 2. Phase diagrams

Figures S1 - S8 below show phase diagrams of all investigated mixtures. Each point represents an experimental sample prepared; those indicated in blue were investigated by SAXS.

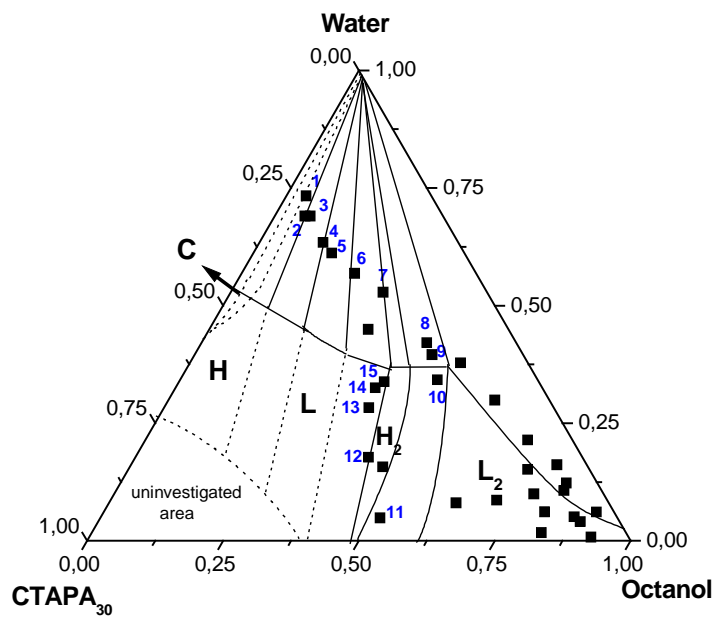

**Fig. S1** Samples prepared along the ternary phase diagram  
(octanol+ water +  $C_{16}TAPA_{30}$ )

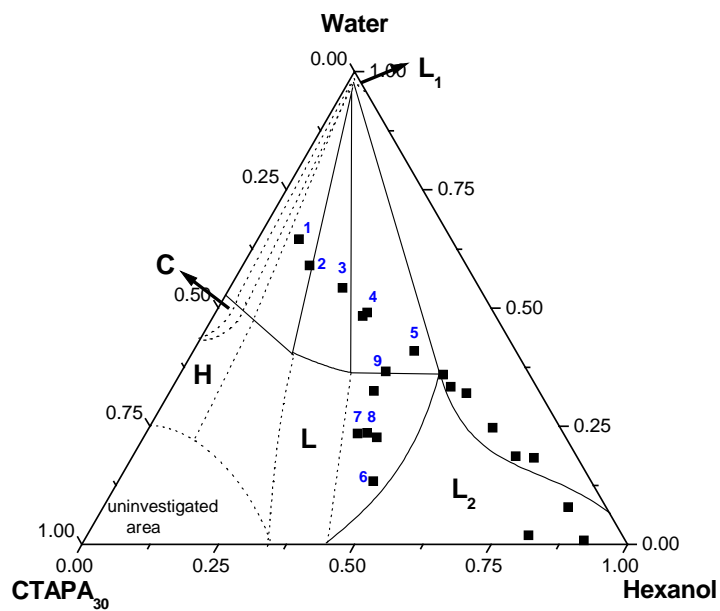

**Fig. S2** Samples prepared along the ternary phase diagram  
(hexanol+ water +  $C_{16}TAPA_{30}$ )



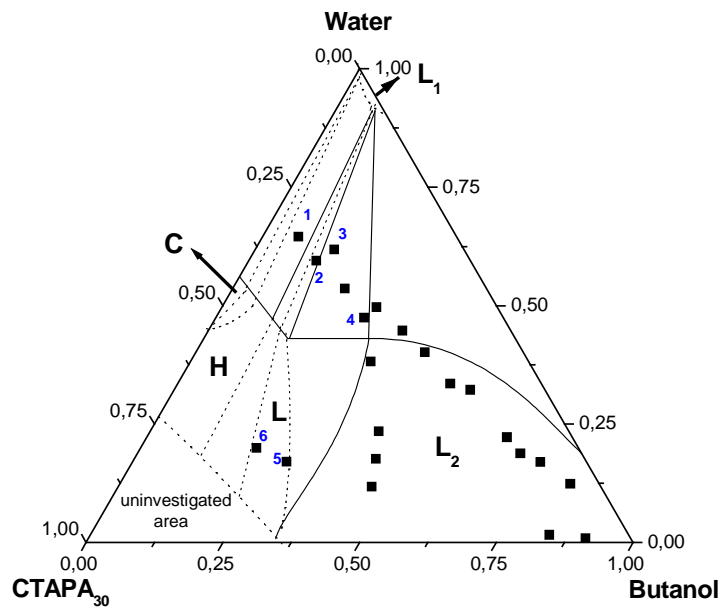

**Fig. S3** Samples prepared along the ternary phase diagram  
(butanol+ water +  $C_{16}TAPA_{30}$ )

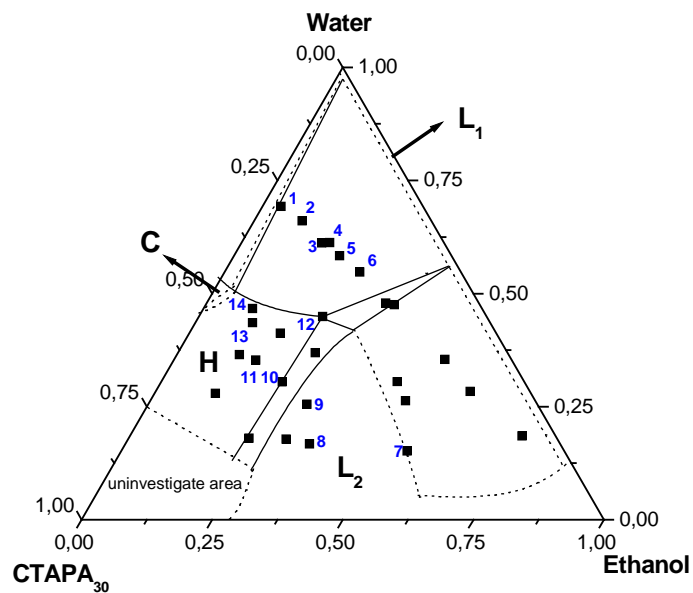

**Fig. S4** Samples prepared along the ternary phase diagram  
(ethanol+ water +  $C_{16}TAPA_{30}$ )

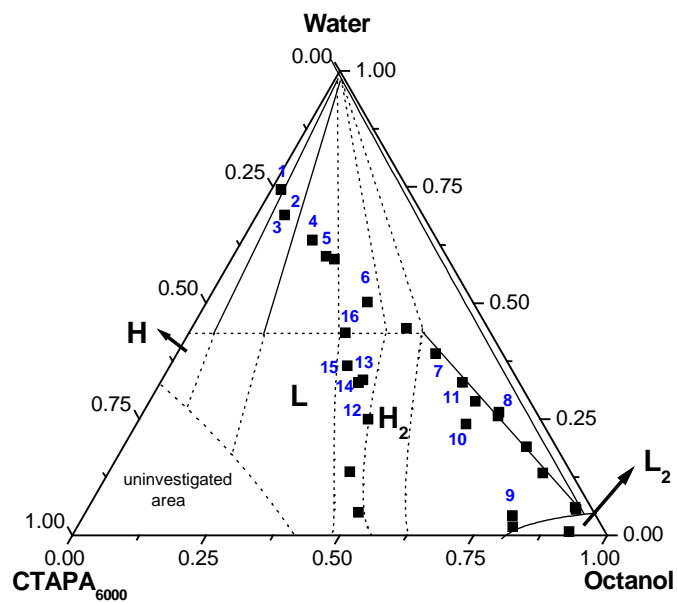

**Fig. S5** Samples prepared along the ternary phase diagram  
(octanol+ water + C<sub>16</sub>TAPA<sub>6000</sub>)

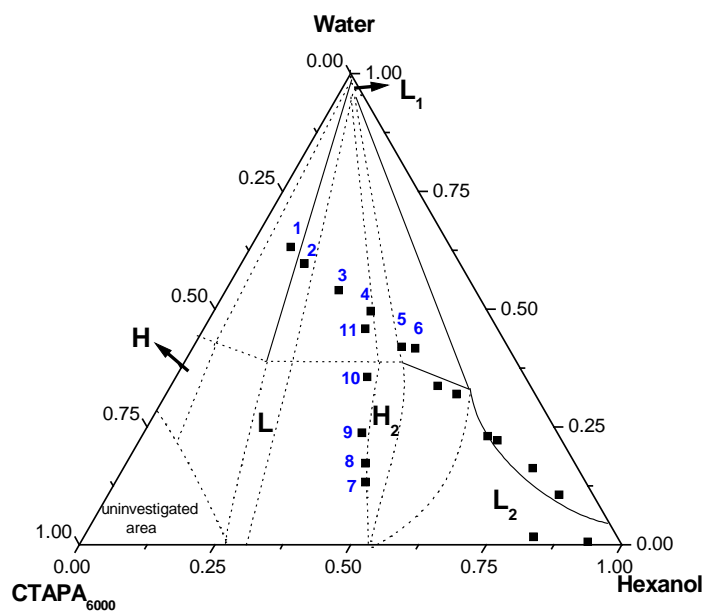

**Fig. S6** Samples prepared along the ternary phase diagram  
(hexanol+ water + C<sub>16</sub>TAPA<sub>6000</sub>)

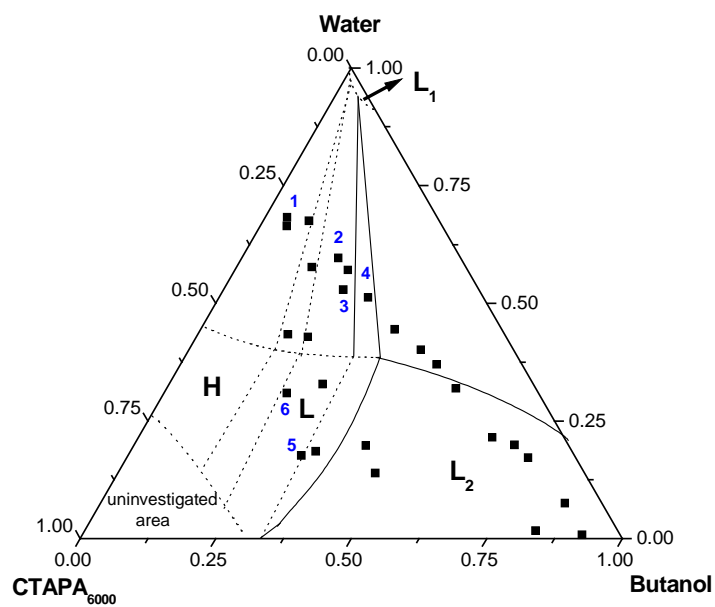

**Fig. S7** Samples prepared along the ternary phase diagram  
(butanol+ water + C<sub>16</sub>TAPA<sub>6000</sub>)

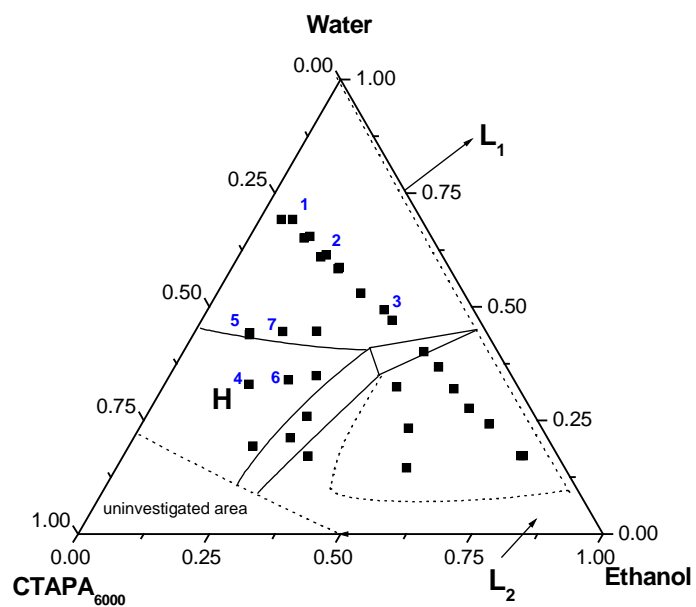

**Fig. S8** Samples prepared along the ternary phase diagram  
(ethanol+ water + C<sub>16</sub>TAPA<sub>6000</sub>)
